# Supplementary figures and images for: Exploring Cinnamic Acids as Potent Antimetastatic Agents for Cancer Therapy: Molecular Docking and Dynamic Simulation against MMP2
Source: Hindawi journal article supplement (doi:10.1155/2024/3727684), 2024-04-17

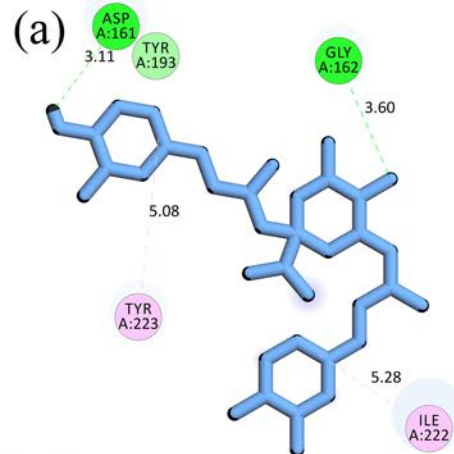

Interactions

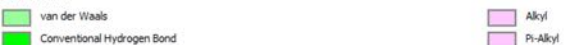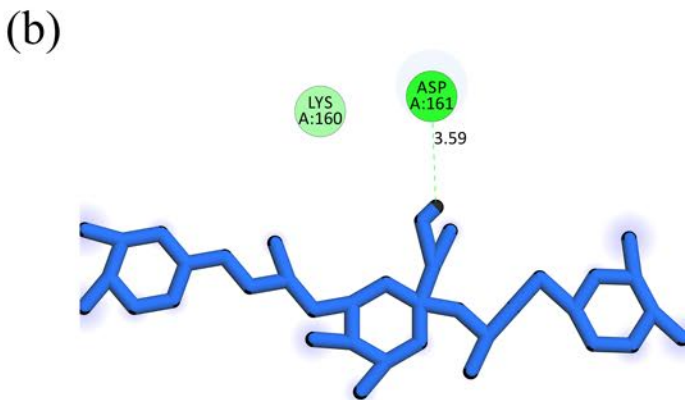

Interactions

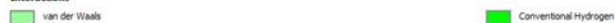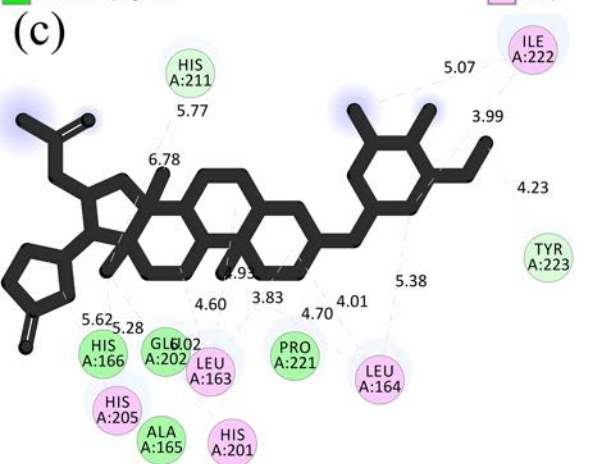

Interactions

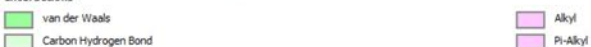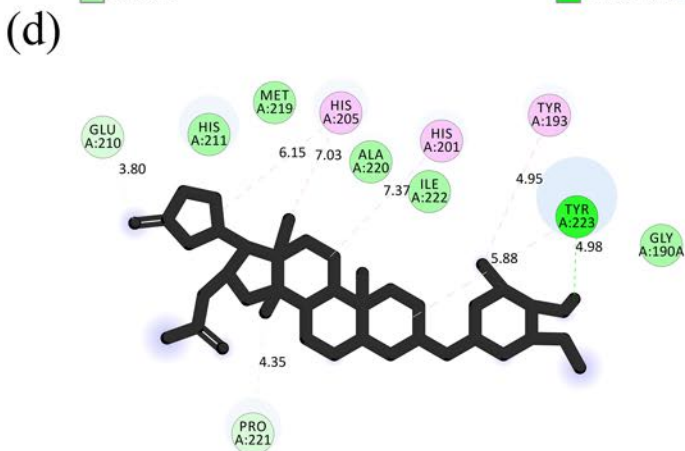

Interactions

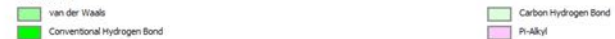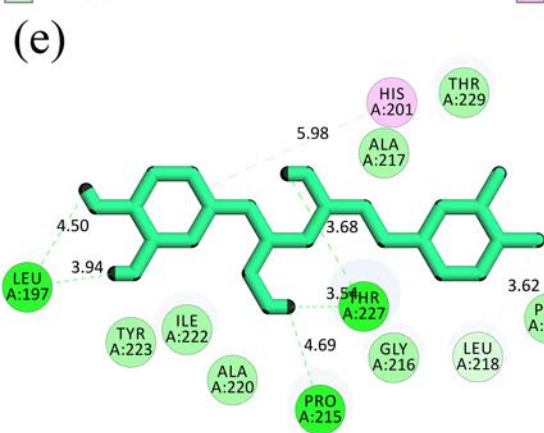

Interactions

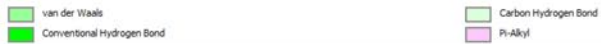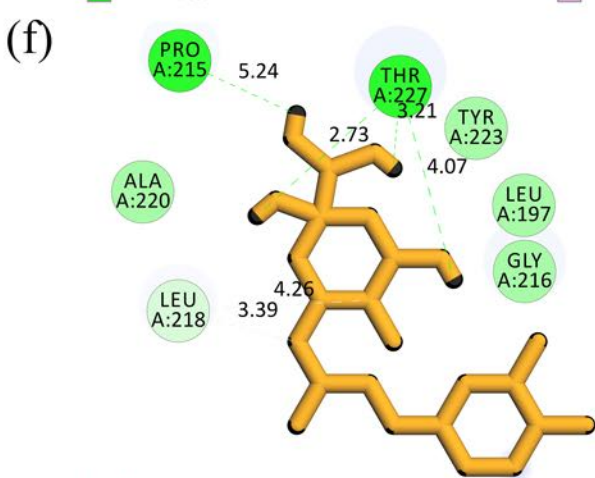

Interactions

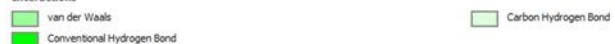

Supplement: f1 [file 3727684.f1.pdf]
